# Supplementary material
Source: publisher figshare collection journal article supplement (https://acs.figshare.com/ndownloader/files/5331526)
Supplement: Supplementary file 1 [file 5331526]

Supporting Information for:

**New pathways for Asphaltenes Upgrading Using Oxy-Cracking Process**

Maryam Ashtari,<sup>a,\*</sup> Lante Carbognani Ortega,<sup>a</sup> Francisco Lopez-Linares,<sup>a,b</sup> Abdelatif Eldood,<sup>a</sup>  
Pedro Pereira-Almao<sup>a</sup>

a Department of Chemical & Petroleum Engineering, Schulich School of Engineering University of Calgary,  
Calgary, Canada, T2N1N4

b. Present address; Petroleum and Materials Characterization Unit, Chevron Energy Technology Company,  
100 Chevron Way, Richmond, California, 94801, United States

**List of Figures.**

**Figure S1.** Model and experimental products and reactants carbon mass at 200°C, a. asphaltene carbon mass, b. organic carbon mass in liquid, c. inorganic carbon mass in liquid plus carbon in CO<sub>2</sub> gas.

**Figure S2.** Model and experimental products and reactants carbon mass at 210°C, a. asphaltene carbon mass, b. organic carbon mass in liquid, c. inorganic carbon mass in liquid plus carbon in CO<sub>2</sub> gas.

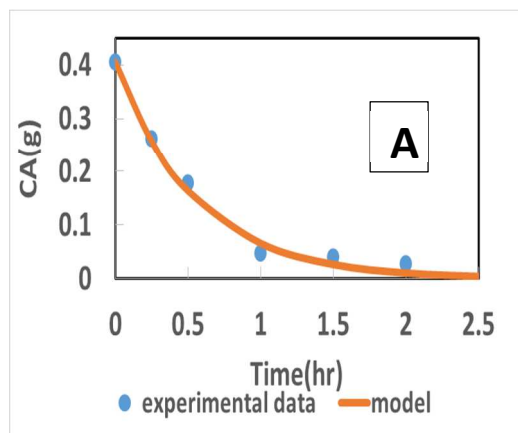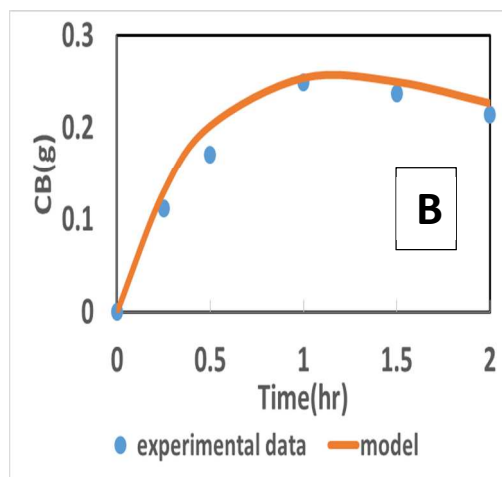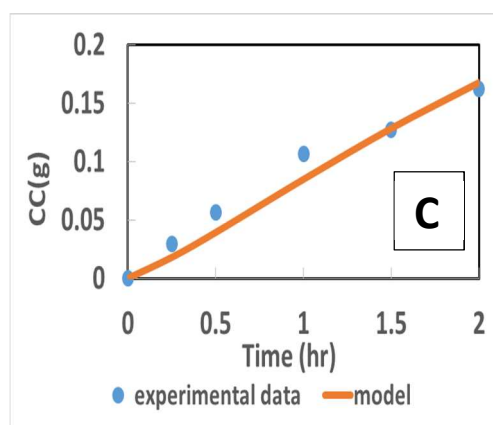

**Figure S1**

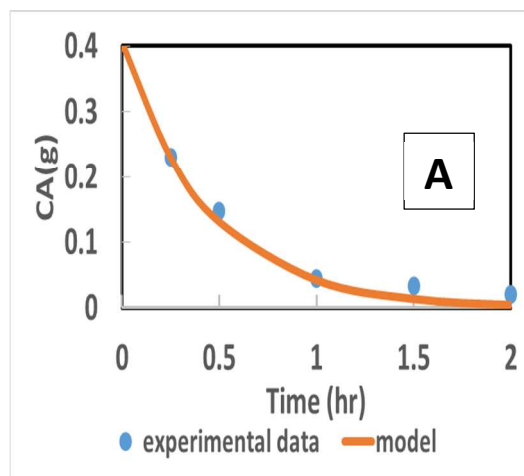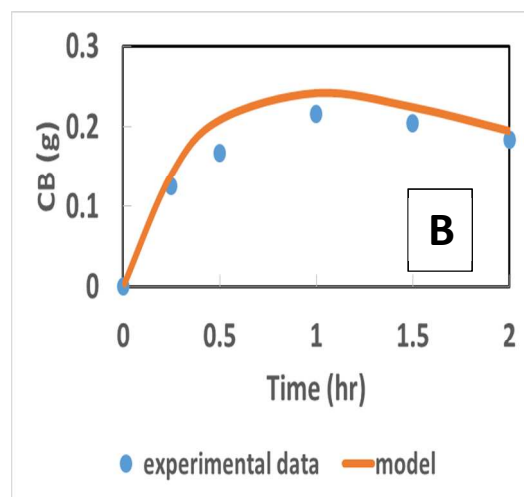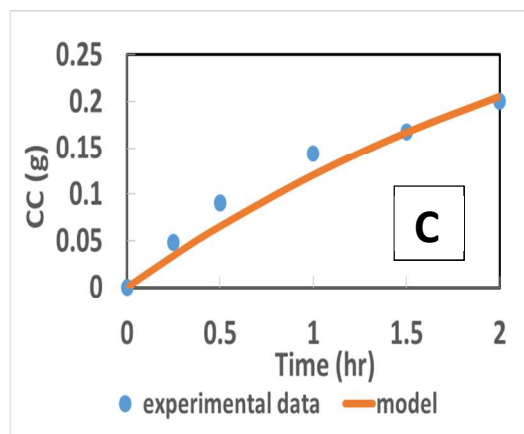

**Figure S2**
